# Supplementary material for: Coagulation factor VIII levels and the risk of cardiovascular events: Systematic review and Meta-analysis
Source: Research Square preprint supplement (doi:10.21203/rs.3.rs-8021341/v1), 2025-12-08
Supplement: Supplementary file 1 [file b547e32329152bab7fb098e2.docx]

**Search strategy**

**Cochrane library**

((Factor VIII):MeSH OR (FVIII OR Factor Eight):ti,ab,kw) AND (((Stroke):MeSH OR (Stroke* OR Apoplexy OR Cerebrovascular Accident* OR Cerebrovascular OR Brain Vascular):ti,ab,kw) OR ((Ischemic Attack, Transient):MeSH OR (TIA OR Transient Ischemic Attack* OR Cerebral Ischemia* OR Brainstem Ischemia*):ti,ab,kw) OR ((Myocardial Infarction):MeSH OR (Myocardial Infarct* OR Heart Attack* OR Cardiovascular Stroke*):ti,ab,kw) OR ((Angina Pectoris):MeSH OR (Angor Pectoris OR Stenocardia*):ti,ab,kw) OR ((Heart Failure):MeSH OR (Cardiac Failure OR Heart Decompensation OR Myocardial Failure):ti,ab,kw))

**Embase**

('blood clotting factor 8'/exp OR'antihaemophilic factor viii':ti,ab,kw OR 'blood coagulation factor 8':ti,ab,kw OR 'blood factor viii':ti,ab,kw OR 'coagulation factor viii':ti,ab,kw OR 'factor 8' OR 'factor VIII':ti,ab,kw OR 'blood clotting factor 8':ti,ab,kw) AND (('cerebrovascular accident'/exp OR 'acute stroke':ti,ab,kw OR 'apoplexia':ti,ab,kw OR 'apoplexy':ti,ab,kw OR 'brain attack':ti,ab,kw OR 'cerebral vascular accident':ti,ab,kw OR 'CVA':ti,ab,kw OR 'stroke':ti,ab,kw OR 'thrombotic stroke':ti,ab,kw OR 'cerebrovascular accident':ti,ab,kw) OR ('transient ischemic attack'/exp OR 'ischemic attack':ti,ab,kw OR 'ischemic cerebral attack':ti,ab,kw OR 'mini-stroke':ti,ab,kw OR 'TIA':ti,ab,kw OR 'transient brain ischemia':ti,ab,kw OR 'transient cerebral ischemia':ti,ab,kw OR 'transient ischemic attack':ti,ab,kw) OR ('heart infarction'/exp OR 'cardiac infarction':ti,ab,kw OR 'heart attack':ti,ab,kw OR 'heart infarct':ti,ab,kw OR 'myocardial infarction':ti,ab,kw OR 'myocardium infarction':ti,ab,kw OR 'subendocardial infarction':ti,ab,kw OR 'transmural heart infarction':ti,ab,kw OR 'heart infarction':ti,ab,kw) OR ('angina pectoris'/exp OR 'angina':ti,ab,kw OR 'anginal attack':ti,ab,kw OR 'stenocardia':ti,ab,kw OR 'angina pectoris':ti,ab,kw) OR ('heart failure'/exp OR 'cardiac decompensation':ti,ab,kw OR 'cardiac failure':ti,ab,kw OR 'cardiac incompetence':ti,ab,kw OR 'cardiac insufficiency':ti,ab,kw OR 'cardial decompensation':ti,ab,kw OR 'cardial insufficiency':ti,ab,kw OR 'chronic heart failure':ti,ab,kw OR 'chronic heart insufficiency':ti,ab,kw OR 'heart decompensation':ti,ab,kw OR 'heart insufficiency':ti,ab,kw OR 'myocardial failure':ti,ab,kw OR 'myocardial insufficiency':ti,ab,kw OR 'heart failure':ti,ab,kw))

**PubMed**

("Factor VIII"[Mesh] OR "FVIII"[Title/Abstract] OR "Factor Eight"[Title/Abstract]) AND (("Stroke"[Mesh] OR “Stroke*”[Title/Abstract] OR “Apoplexy”[Title/Abstract] OR “Cerebrovascular Accident*”[Title/Abstract] OR “Cerebrovascular”[Title/Abstract] OR “Brain Vascular Accident*”[Title/Abstract] OR "Ischemic Stroke"[Title/Abstract]) OR ("Ischemic Attack, Transient"[Mesh] OR “TIA”[Title/Abstract] OR “Transient Ischemic Attack*”[Title/Abstract] OR “Cerebral Ischemia*”[Title/Abstract] OR “Brainstem Ischemia*”[Title/Abstract]) OR ("Myocardial Infarction"[Mesh] OR “Myocardial Infarct*”[Title/Abstract] OR “Heart Attack*”[Title/Abstract] OR “Cardiovascular Stroke*”[Title/Abstract]) OR ("Angina Pectoris"[Mesh] OR “Angor Pectoris”[Title/Abstract] OR “Stenocardia*”[Title/Abstract]) OR ("Heart Failure"[Mesh] OR “Cardiac Failure” [Title/Abstract] OR “Heart Decompensation” [Title/Abstract] OR “Myocardial Failure” [Title/Abstract]))

**Web Of Science**

("Factor VIII" OR "FVIII" OR "Factor Eight") AND (("Stroke" OR “Stroke*” OR “Apoplexy” OR “Cerebrovascular Accident*” OR “Cerebrovascular” OR “Brain Vascular Accident*” OR "Ischemic Stroke") OR ("Ischemic Attack, Transient" OR “TIA” OR “Transient Ischemic Attack*” OR “Cerebral Ischemia*” OR “Brainstem Ischemia*”) OR ("Myocardial Infarction" OR “Myocardial Infarct*” OR “Heart Attack*” OR “Cardiovascular Stroke*”) OR ("Angina Pectoris" OR “Angor Pectoris” OR “Stenocardia*”) OR ("Heart Failure" OR “Cardiac Failure” OR “Heart Decompensation” OR “Myocardial Failure”))
